# Supplementary material
Source: MDPI journal article supplement (https://www.mdpi.com/2079-6412/14/3/332)
Supplement: s1 [file s1]

# Supporting information: Cu-Ethanolamine Nanozymes Promote Urushiol Oxidation of Lacquer

Yan Zhang <sup>1</sup>, Ying Zhou <sup>1</sup>, Lishou Ban <sup>2,\*</sup>, Tian Tang <sup>1,\*</sup>, Qian Liu <sup>3</sup>, Xijun Liu <sup>4</sup> and Jia He <sup>5,\*</sup>

<sup>1</sup> School of Art and Design, Tianjin University of Technology, Tianjin 300384, China; zhangyan@email.tjut.edu.cn (Y.Z.); 15226716796@163.com (Y.Z.)

<sup>2</sup> School of Materials Science and Engineering, Tianjin University of Technology, Tianjin 300384, China

<sup>3</sup> Institute for Advanced Study, Chengdu University, Chengdu 610106, China; liuqian@cdu.edu.cn

<sup>4</sup> Guangxi Key Laboratory of Electrochemical Energy Materials, School of Chemistry and Chemical Engineering, Guangxi University, 100 Daxue Road, Nanning 530004, China; xjliu@tjut.edu.cn

<sup>5</sup> School of Chemistry and Chemical Engineering, Tianjin University of Technology, Tianjin 300384, China

\* Correspondence: banlishou@stud.tjut.edu.cn (L.B.); tangtian69023065@email.tjut.edu.cn (T.T.); hejia@tjut.edu.cn (J.H.)

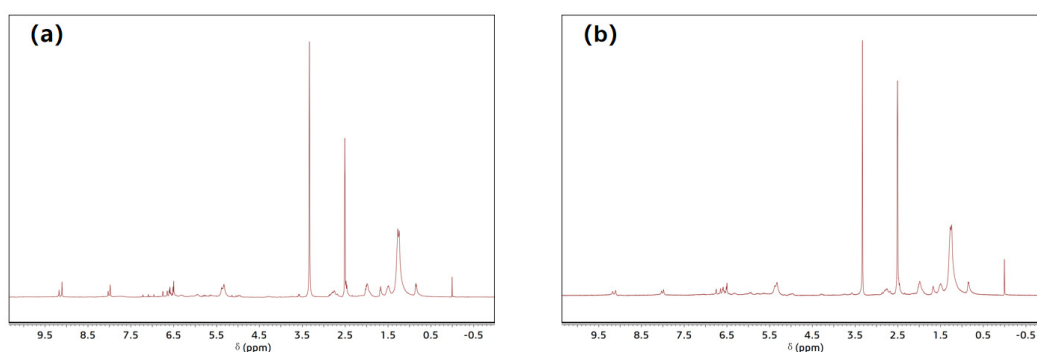

**Figure S1.** NMR of reaction of Cu-Ethanolamine nanozymes with raw lacquer before (a) and after filtration (b).

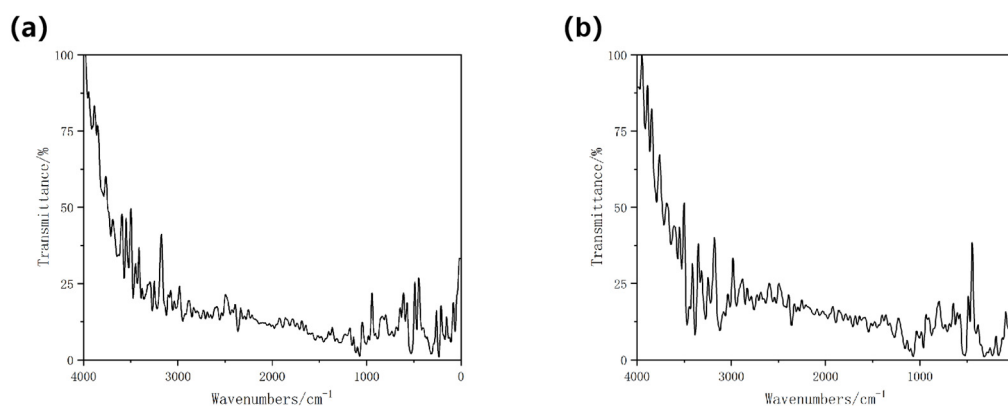

**Figure S2.** FTIR of reaction of Cu-Ethanolamine nanozymes with raw lacquer before (a) and after filtration (b).

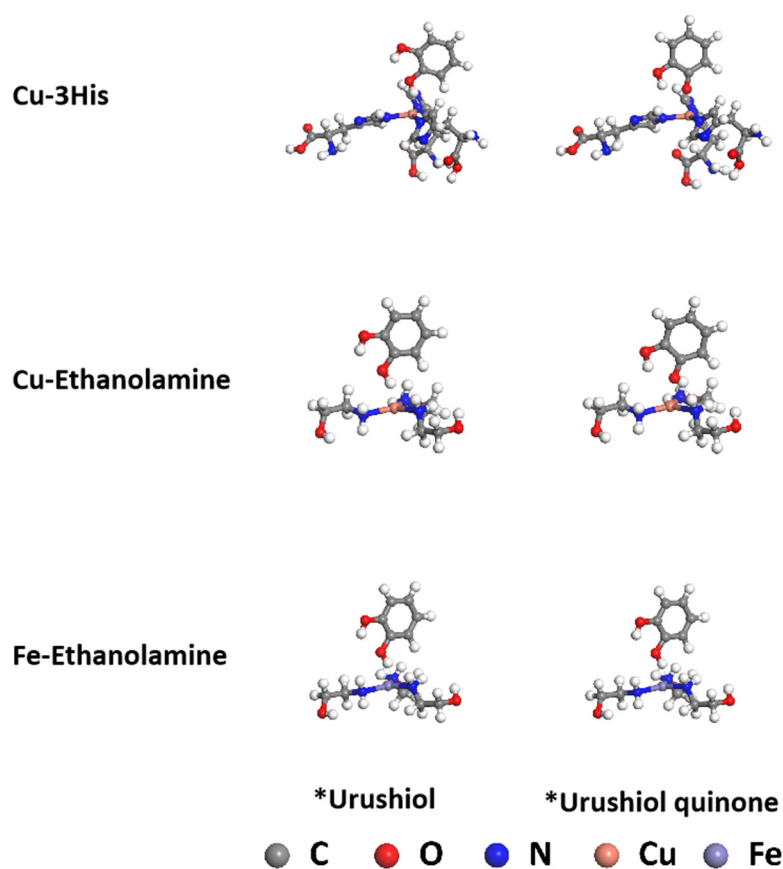

**Figure S3.** Adsorption models of urushiol and urushiol quinone on three structures..

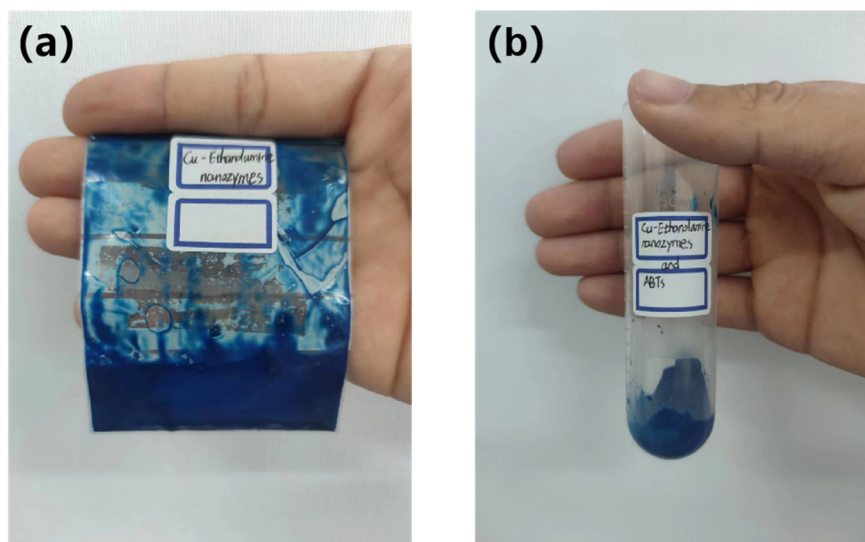

**Figure S4.** (a) Cu-Ethanolamine nanozymes and (b) Reaction of Cu-Ethanolamine nanozymes and ABTs.

**Table S1.** The adsorption energy of three structures for Urushiol and Urushiol quinone.

|                 | <b>*Urushiol</b> | <b>*Urushiol quinone</b> |
|-----------------|------------------|--------------------------|
| Cu-3His         | -0.07 eV         | -0.49 eV                 |
| Cu-Ethanolamine | -0.57 eV         | -3.82 eV                 |
| Fe-Ethanolamine | -0.03 eV         | -0.94 eV                 |

**Table S2.** The adsorption energy of laccase and Cu-Ethanolamine for Urushiol and Urushiol quinone which calculated by DFT-D method.

|                 | <b>*Urushiol</b> | <b>*Urushiol quinone</b> |
|-----------------|------------------|--------------------------|
| Cu-3His         | -0.52 eV         | -0.91 eV                 |
| Cu-Ethanolamine | -0.74 eV         | -4.32 eV                 |
